# Supplementary material
Source: publisher figshare collection journal article supplement (https://tandf.figshare.com/ndownloader/files/22505723)
Supplement: Supplementary file 1 [file 22505723]

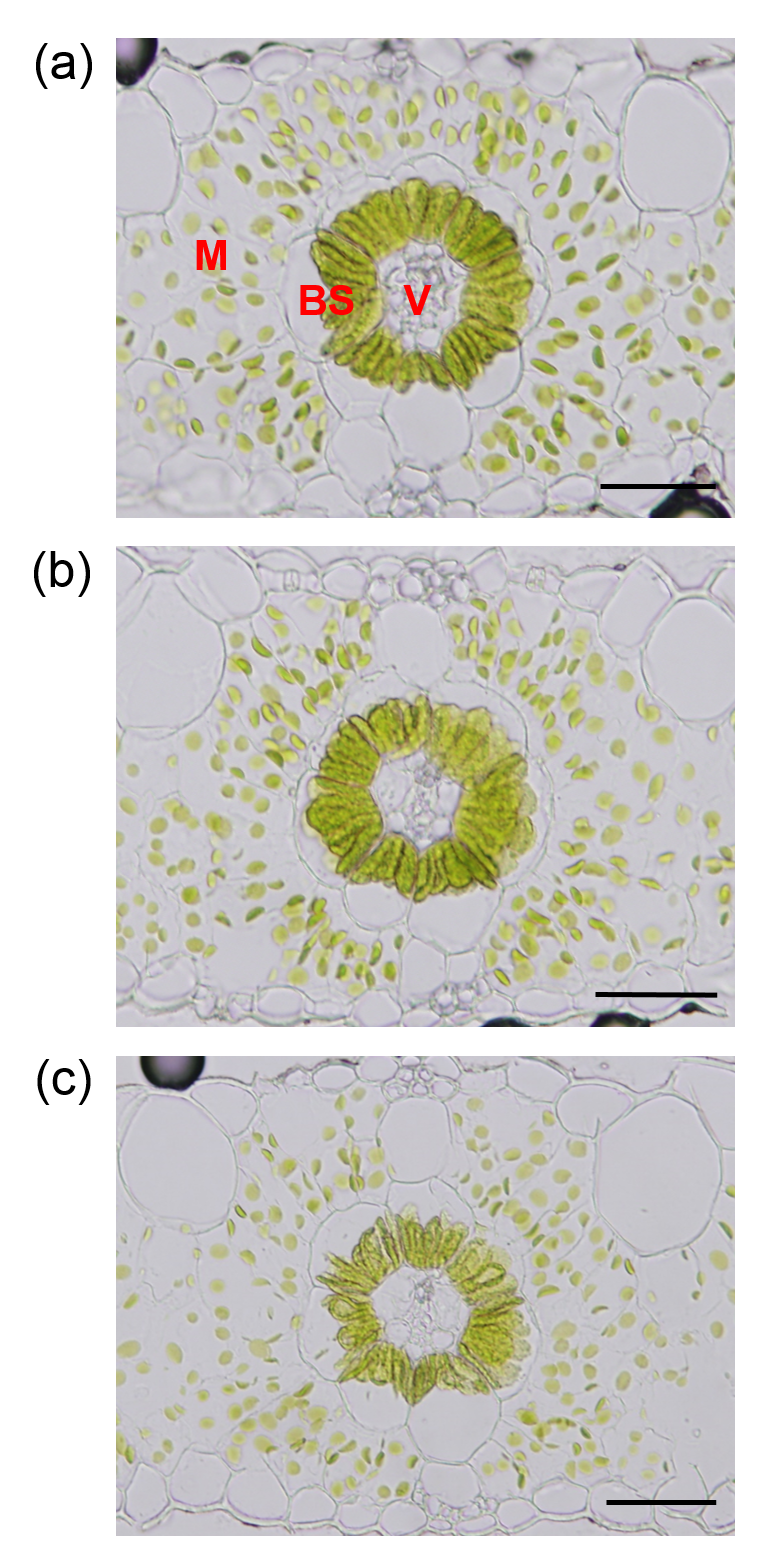


Supplementary data 1. The intracellular arrangement of chloroplasts in the dark. Transverse sections were observed with a light microscope before (A), 6 h (B) and 12 h (C) after the start of dark treatment. Scale bars = 50 µm. BS, bundle sheath cell; M, mesophyll cell; V, vascular bundle.
